# Supplementary material
Source: PubMed Central journal article supplement (PMC3457128)
Supplement: JVI.00790-12_zjv999096673so1.pdf [file JVI.00790-12_zjv999096673so1.pdf]

**Table S1. Patient characteristics.**

| Patient ID                               | Set-point<br>HIV VL | CD4%<br>nadir | CD4<br>cells/mm <sup>3</sup><br>nadir | Month<br>CMV<br>detected | Months of<br>Follow-up | Age, Illnesses at death <sup>a</sup> |
|------------------------------------------|---------------------|---------------|---------------------------------------|--------------------------|------------------------|--------------------------------------|
| <b>Infected <i>in utero</i> (n = 10)</b> |                     |               |                                       |                          |                        |                                      |
| 045                                      | 5.2                 | 22            | 2588                                  | 3                        | 24                     |                                      |
| 093                                      | 6.4                 | 20            | 810                                   | 3                        | 24                     |                                      |
| 116 <sup>b</sup>                         | 6.6                 | 0             | 6                                     | 3                        | 24                     | M24, FTT, pneumonia                  |
| 135                                      | 7.0                 | 2             | 129                                   | birth                    | 15                     | M15, FTT, pneumonia, diarrhea        |
| 156                                      | 5.4                 | 35            | 2508                                  | birth                    | 6                      | M6, pneumonia, sepsis                |
| 161 <sup>b</sup>                         | 8.0                 | 3             | 165                                   | 1                        | 7                      | M7, FTT, meningitis, TB              |
| 170                                      | 5.2                 | 17            | 1414                                  | 1                        | 18                     |                                      |
| 211                                      | 6.5                 | 10            | 617                                   | 3                        | 24                     |                                      |
| 258                                      | 6.6                 | 20            | 925                                   | 1                        | 12                     |                                      |
| 313                                      | 5.8                 | 10            | 674                                   | 3                        | 24                     |                                      |
| <b>Infected peripartum (n = 9)</b>       |                     |               |                                       |                          |                        |                                      |
| 040 <sup>c</sup>                         | NA                  | NA            | NA                                    | 3                        | 5                      | M5, diarrhea, sepsis, anemia         |
| 105 <sup>c</sup>                         | NA                  | NA            | NA                                    | not detected             | 3                      | M4, FTT, pneumonia                   |
| 159                                      | 5.8                 | 18            | 621                                   | 20                       | 24                     | M24                                  |
| 291                                      | 6.8                 | 9             | 515                                   | 3                        | 15                     | M17, FTT, diarrhea                   |
| 298                                      | 6.0                 | 12            | 782                                   | 3                        | 7                      | M7, FTT, pneumonia, diarrhea         |
| 303                                      | 6.6                 | 17            | 1639                                  | 10                       | 12                     | M13, FTT, pneumonia                  |
| 334                                      | 6.2                 | 24            | 2372                                  | 1                        | 9                      | M11, FTT                             |
| 411                                      | 6.5                 | 15            | 637                                   | 3                        | 24                     |                                      |
| 473                                      | 7.1                 | 6             | 628                                   | 1                        | 18                     | M18, FTT, pneumonia                  |
| <b>HIV-exposed uninfected (n = 6)</b>    |                     |               |                                       |                          |                        |                                      |

---

|     |    |    |    |   |    |
|-----|----|----|----|---|----|
| 059 | NA | NA | NA | 3 | 12 |
| 081 | NA | NA | NA | 3 | 12 |
| 122 | NA | NA | NA | 3 | 12 |
| 180 | NA | NA | NA | 3 | 12 |
| 272 | NA | NA | NA | 3 | 15 |
| 461 | NA | NA | NA | 3 | 15 |

---

NOTES. VL= viral load; M= month; FTT= failure to thrive; TB= *Mycobacterium tuberculosis*; NA = not available.

<sup>a</sup>Major symptoms/disease identified at the time of death by clinician or verbal autopsy of parent. <sup>b</sup>Upon thawing, the majority of cells from subject 116 at month 9, and 161 at month 3 were dead and are thus excluded from the analysis. <sup>c</sup>Two infants died before the definition of set-point was met and before any CD4 counts were conducted.
