# Supplementary material
Source: PubMed Central journal article supplement (PMC3457128)
Supplement: JVI.00790-12_zjv999096673so2.pdf [file JVI.00790-12_zjv999096673so2.pdf]

**Table S2. Predictors of T cell activation and vulnerability.**

|                                              | HIV-infected infants |                 |        | HIV-exposed uninfected infants |               |        |
|----------------------------------------------|----------------------|-----------------|--------|--------------------------------|---------------|--------|
|                                              | Coeff                | [95% CI]        | p      | Coeff                          | [95% CI]      | p      |
| <b>A. Predictors of T cell activation</b>    |                      |                 |        |                                |               |        |
| <i>CD4<sup>+</sup> T cells</i>               |                      |                 |        |                                |               |        |
| CMV infected                                 | -32                  | [-52, -13]      | 0.001  | 3.3                            | [0.69, 5.9]   | 0.01   |
| CMV viral load                               | *                    | *               | *      | -0.90                          | [-2.4, 0.63]  | 0.3    |
| HIV viral load                               | -1.4                 | [-2.9, -0.0091] | 0.05   | *                              | *             | *      |
| Interaction <sup>a</sup>                     | 5.4                  | [2.5, 8.3]      | <0.001 | *                              | *             | *      |
| <i>CD8<sup>+</sup> T cells</i>               |                      |                 |        |                                |               |        |
| CMV infected                                 | 13                   | [4.2, 22]       | 0.004  | 6.6                            | [-3.9, 17]    | 0.2    |
| CMV viral load                               | 6.7                  | [1.7, 12]       | 0.009  | 7.2                            | [-0.11, 14]   | 0.05   |
| <b>B. Predictors of T cell vulnerability</b> |                      |                 |        |                                |               |        |
| <i>CD4<sup>+</sup> T cells</i>               |                      |                 |        |                                |               |        |
| %Activated CD4 cells                         | *                    | *               | *      | 0.22                           | [0.078, 0.37] | 0.003  |
| CMV infected                                 | 3.5                  | [0.66, 6.3]     | 0.02   | 0.20                           | [-2.1, 2.5]   | 0.9    |
| CMV viral load                               | *                    | *               | *      | 0.13                           | [-0.96, 1.2]  | 0.8    |
| <i>CD8<sup>+</sup> T cells</i>               |                      |                 |        |                                |               |        |
| %Activated CD8 cells                         | 0.43                 | [0.10, 0.76]    | 0.01   | 1.4                            | [0.94, 1.9]   | <0.001 |
| CMV infected                                 | 23                   | [13, 33]        | <0.001 | 12                             | [0.25, 24]    | 0.05   |
| CMV viral load                               | *                    | *               | *      | -1.9                           | [-10, 6.2]    | 0.6    |

Notes. \*Covariate had no detectable effect on outcome, so excluded from final multivariate model. <sup>a</sup>Interaction term = CMV infection x HIV viral load.

Outcome is % activated or % apoptosis-vulnerable CD4<sup>+</sup> or CD8<sup>+</sup> T cells as indicated in shaded row headings. Predictor variables used in linear regression models are shown in the unshaded rows; “CMV infected” is a dichotomous predictor (Yes/No) and all viral loads were log10-transformed. Table shows point-estimates for all main effects and interactions included in final models, with the exception of time (time since HIV infection for HIV-infected infants, or age for HIV-EU). For HIV-infected infants, T cell activation models evaluated CMV infection,

CMV viral load, HIV-1 viral load, time since HIV infection, and an interaction term (CMV co-infection x HIV viral load). T cell vulnerability models evaluated these same covariates and additionally included % of activated cells. Non-significant terms were excluded in a stepwise manner to achieve a final parsimonious model with the best fit (smallest p value for Wald test). Terms were removed in the following order: interaction, HIV viral load, CMV viral load.

For HIV-exposed uninfected infants, all models evaluated CMV infection, CMV viral load, and age in months. T cell vulnerability models evaluated the same covariates as activation models, and additionally included % of activated cells.
